# Supplementary material
Source: PubMed Central journal article supplement (PMC9625093)

# Urine uromodulin as a biomarker of kidney tubulointerstitial fibrosis

Melchinger, Calderon-Gutierrez et. al.

## Contents

|                                                                                                                                                             |    |
|-------------------------------------------------------------------------------------------------------------------------------------------------------------|----|
| Supplemental table 1. Classification of histological features.....                                                                                          | 2  |
| Supplemental Table 2. Degree of missingness of key covariates.....                                                                                          | 3  |
| Supplemental Table 3. Correlation of histological features with urine uromodulin level .....                                                                | 4  |
| Supplemental Table 4. Correlation of urine uromodulin level with other kidney biomarkers.....                                                               | 5  |
| Supplemental Table 5. Univariable and multivariable association of uromodulin level with histological features.....                                         | 6  |
| Supplemental Table 6. Association of urine uromodulin with tubulointerstitial and glomerular fibrosis after controlling for histological diagnosis .....    | 7  |
| Supplemental Table 7. Association of uromodulin with tubulointerstitial and glomerular fibrosis without indexing to urine creatinine .....                  | 8  |
| Supplemental Table 8. Association of uromodulin with tubulointerstitial and glomerular fibrosis with multiple imputations to account for missing data ..... | 9  |
| Supplemental Table 9. Comparison of uromodulin staining on various mouse kidney biopsy models .....                                                         | 10 |
| Supplemental Figure 1. STARD flow diagram .....                                                                                                             | 11 |

**Supplemental table 1. Classification of histological features**

| <b>Histological feature</b>           | <b>Definition</b>                                                                                               |
|---------------------------------------|-----------------------------------------------------------------------------------------------------------------|
| Interstitial fibrosis tubular atrophy | Continuous (% of biopsy tissue affected)* and categories (<10%, 10-25%, >25%)                                   |
| Glomerulosclerosis                    | Continuous (% of total glomeruli with global glomerulosclerosis) and categories (<10%, 10-25%, >25%)            |
| Infiltrate                            | Categories: <10%: minimal, none; 10-25%: present, patchy, focal, active; >25%: diffuse                          |
| Eosinophils                           | Categories (yes/no)                                                                                             |
| Arterionephrosclerosis                | Categories: <10%: absent, none, minimal; 10-25%: mild, present; >25%: moderate, severe                          |
| Acute tubular injury                  | Categories; No: absent, not reported; Yes: acute, diffuse, focal, mild, moderate, patchy, present, severe, yes. |
| Tubulitis                             | Categories (yes, no)                                                                                            |
| Crescents                             | Categories (yes, no)                                                                                            |

*\*IF/TA was classified as 0 if reported as none.*

**Supplemental Table 2. Degree of missingness of key covariates**

| <b>Characteristic</b>                    | <b>Missing</b> |
|------------------------------------------|----------------|
| <b>Demographics</b>                      |                |
| Age, years                               | 0              |
| Female                                   | 0              |
| Black race                               | 5              |
| Diabetes                                 | 3              |
| Hypertension                             | 0              |
| Cirrhosis                                | 3              |
| Chronic kidney disease                   | 28             |
| Body mass index (BMI), kg/m <sup>2</sup> | 1              |
| <b>Medication use</b>                    |                |
| PPI use                                  | 2              |
| NSAID use                                | 2              |
| Antibiotic use                           | 6              |
| <b>Prebiopsy Laboratory Features</b>     |                |
| Creatinine, mg/dl                        | 23             |
| eGFR, ml/min                             | 28             |
| Protein to creatinine ratio, mg/mg       | 83             |
| Albumin to creatinine ratio, mg/mg       | 0              |
| <b>Features at Biopsy</b>                |                |
| AKI or AKD                               | 0              |
| Dialysis                                 | 1              |
| Creatinine, mg/dl                        | 0              |
| Blood Urea Nitrogen, mg/dl               | 0              |
| Bicarbonate, serum                       | 0              |
| Hemoglobin, g/dl                         | 4              |
| Kidney size, inches                      | 107            |
| <b>Histology</b>                         |                |
| IF/TA                                    | 27             |
| Global glomerulosclerosis                | 33             |
| Infiltrate                               | 27             |
| Arterionephrosclerosis                   | 62             |
| Eosinophils                              | 0              |
| ATI                                      | 0              |
| Tubulitis                                | 0              |
| Crescents                                | 3              |

*PPI = proton pump inhibitor, NSAID = non-steroidal anti-inflammatory drug, eGFR = estimated glomerular filtration rate, AKI = acute kidney injury, ADK = acute kidney disease, IF/TA = interstitial fibrosis/tubular atrophy, ATI = acute tubular injury.*

**Supplemental Table 3. Correlation of histological features with urine uromodulin level**

| Characteristic               | Correlation coefficient | P-value  |
|------------------------------|-------------------------|----------|
| <b>Baseline features</b>     |                         |          |
| Creatinine                   | -0.42                   | 6.11E-16 |
| eGFR                         | 0.37                    | 3.59E-12 |
| Albuminuria                  | -0.06                   | 0.27     |
| Proteinuria                  | -0.06                   | 0.3      |
| <b>Features at biopsy</b>    |                         |          |
| Serum Creatinine             | -0.43                   | 1.54E-17 |
| Blood urea nitrogen          | -0.24                   | 4.99E-06 |
| Bicarbonate, serum           | 0.2                     | 9.41E-05 |
| Anion Gap                    | -0.18                   | 6.62E-04 |
| Kidney size                  | 0.18                    | 4.70E-03 |
| Hemoglobin                   | 0.14                    | 0.02     |
| <b>Histological features</b> |                         |          |
| IF/TA                        | -0.31                   | 6.87E-09 |
| Glomerulosclerosis           | -0.21                   | 1.05E-04 |
| Eosinophils                  | -0.15                   | 3.94E-03 |
| Infiltrate                   | -0.15                   | 6.36E-03 |
| Arterio-nephrosclerosis      | -0.13                   | 0.02     |
| ATI                          | 0.07                    | 0.16     |
| Tubulitis                    | -0.07                   | 0.21     |
| Crescents                    | -0.03                   | 0.55     |

Spearman correlation coefficient. eGFR = estimated glomerular filtration rate, IF/TA = interstitial fibrosis/tubular atrophy, ATI = acute tubular injury.

**Supplemental Table 4. Correlation of urine uromodulin level with other kidney biomarkers**

| <b>Biomarker</b> | <b>Rho</b> | <b>P-value</b> | <b>Bonferroni corrected</b> |
|------------------|------------|----------------|-----------------------------|
| Albumin          | 0.06       | 0.27           | 1                           |
| KIM-1            | 0.19       | 0.0004         | 0.01                        |
| NGAL             | -0.22      | <0.0001        | 0.001                       |
| IL-6             | -0.28      | <0.0001        | <0.0001                     |
| TNF-a            | -0.36      | <0.0001        | <0.0001                     |
| IL-9             | -0.11      | 0.04           | 1                           |
| MCP-1            | 0.04       | 0.44           | 1                           |
| YKL-40           | -0.21      | <0.0001        | 0.002                       |

*Spearman correlation coefficient*

**Supplemental Table 5. Univariable and multivariable association of uromodulin level with histological features**

| Characteristic                             | Uromodulin level (log2 transformed) |                             |
|--------------------------------------------|-------------------------------------|-----------------------------|
|                                            | Univariable                         | Multivariable               |
| IF/TA, per 1%                              | <b>-7.19 (-9.30, -5.09)</b>         | <b>-3.47 (-5.68, -1.25)</b> |
| Glomerulosclerosis, per 1%                 | <b>-6.39 (-8.85, -3.93)</b>         | <b>-3.26 (-5.97, -0.55)</b> |
| Infiltrate, present vs. absent             | <b>-0.06 (-0.10, -0.02)</b>         | -0.02 (-0.06, 0.03)         |
| Eosinophils, present vs. absent            | <b>-0.06 (-0.09, -0.02)</b>         | -0.02 (-0.07, 0.03)         |
| Arterionephrosclerosis, present vs. absent | <b>-0.05 (-0.09, -0.01)</b>         | -0.02 (-0.06, 0.03)         |
| Tubulitis, present vs. absent              | -0.04 (-0.08, 0.00)                 | -0.02 (-0.07, 0.02)         |
| Tubular injury, present vs. absent         | 0.03 (-0.01, 0.06)                  | 0.04 (0.00, 0.09)           |
| Crescents, present vs. absent              | -0.01 (-0.03, 0.02)                 | -0.01 (-0.03, 0.02)         |

*Linear regression analysis for outcome of histological features and exposure as log<sub>2</sub>uromodulin level.*

*Values represent unit difference in outcome per 2-fold difference in urine uromodulin level.*

*Significant associations in bold.*

*Multivariable model controls for baseline (pre-biopsy) eGFR, urine albumin to creatinine ratio and serum creatinine at biopsy*

**Supplemental Table 6. Association of urine uromodulin with tubulointerstitial and glomerular fibrosis after controlling for histological diagnosis**

| Histological feature                                          | Difference in histological feature per unit difference in uromodulin |
|---------------------------------------------------------------|----------------------------------------------------------------------|
| <b>Interstitial fibrosis (% of kidney tissue)<sup>1</sup></b> |                                                                      |
| Per 2-fold difference                                         | <b>-2.0 (-4.0, -0.02)</b>                                            |
| T1 (0.14-0.81 mcg/g)                                          | Ref.                                                                 |
| T2 (0.82-1.65 mcg/g)                                          | 2.4 (-2.6, 7.43)                                                     |
| T3 (1.67-12.24 mcg/g)                                         | <b>-6.1 (-11.4, -0.77)</b>                                           |
| <b>Glomerulosclerosis (% of glomeruli)<sup>2</sup></b>        |                                                                      |
| Per 2-fold difference                                         | -1.0 (-3.5, 1.52)                                                    |
| T1 (0.14-0.81 mcg/g)                                          | Ref.                                                                 |
| T2 (0.82-1.65 mcg/g)                                          | -1.9 (-8.2, 4.31)                                                    |
| T3 (1.67-12.24 mcg/g)                                         | 2.3 (-4.4, 8.94)                                                     |

*Analysis: Linear regression analysis with outcome as histological feature (interstitial fibrosis or glomerulosclerosis) and exposure as uromodulin level (log<sub>2</sub> or tertile). Values represent unit differences in outcome (% of total biopsy tissue for IF/TA or % of glomeruli that have global sclerosis for glomerulosclerosis) for each unit (2-fold or tertile) difference of urine uromodulin level. Significant associations in bold.*

*Urine uromodulin to creatinine ratio*

*Controls for baseline eGFR, baseline urine albumin to creatinine ratio and serum creatinine at biopsy; histological diagnosis; glomerulosclerosis<sup>1</sup> and interstitial fibrosis<sup>2</sup>.*

**Supplemental Table 7. Association of uromodulin with tubulointerstitial and glomerular fibrosis without indexing to urine creatinine**

| Histological feature                                           | Difference in histological feature per unit difference in uromodulin |                            |                           |
|----------------------------------------------------------------|----------------------------------------------------------------------|----------------------------|---------------------------|
|                                                                | Model 1                                                              | Model 2                    | Model 3                   |
| <b>Interstitial fibrosis</b> (% of kidney tissue) <sup>1</sup> |                                                                      |                            |                           |
| Per 2-fold difference                                          | <b>-7.6 (-9.4, -5.8)</b>                                             | <b>-4.5 (-6.5, -2.4)</b>   | <b>-3.2 (-5.1, -1.3)</b>  |
| T1 (0.14-0.81 mcg/g)                                           | Ref.                                                                 | Ref.                       | Ref.                      |
| T2 (0.82-1.65 mcg/g)                                           | <b>-11.1 (-16.9, -5.3)</b>                                           | <b>-6.5 (-12.3, -0.8)</b>  | <b>-6.5 (-11.8, -1.1)</b> |
| T3 (1.67-12.24 mcg/g)                                          | <b>-21.5 (-27.3, -15.6)</b>                                          | <b>-10.8 (-17.2, -4.3)</b> | <b>-8.4 (-14.3, -2.5)</b> |
| <b>Glomerulosclerosis</b> (% of glomeruli) <sup>2</sup>        |                                                                      |                            |                           |
| Per 2-fold difference                                          | <b>-5.3 (-7.4, -3.2)</b>                                             | <b>-2.9 (-5.3, -0.3)</b>   | -0.6 (-2.8, 1.8)          |
| T1 (0.14-0.81 mcg/g)                                           | Ref.                                                                 | Ref.                       | Ref.                      |
| T2 (0.82-1.65 mcg/g)                                           | -2.1 (-9.0, 4.8)                                                     | 1.8 (-5.3, 8.8)            | 4.2 (-2.2, 10.6)          |
| T3 (1.67-12.24 mcg/g)                                          | <b>-15.4 (-22.2, -8.7)</b>                                           | -5.3 (-13.0, 2.5)          | 0.2 (-6.9, 7.4)           |

*Analysis: Linear regression analysis with outcome as histological feature (interstitial fibrosis or glomerulosclerosis) and exposure as uromodulin level (log<sub>2</sub> or tertile). Values represent unit differences in outcome (% of total biopsy tissue for IF/TA or % of glomeruli that have global sclerosis for glomerulosclerosis) for each unit (2-fold or tertile) difference of urine uromodulin level. Significant associations in bold.*

*Absolute uromodulin level (without indexing to creatinine)*

*Model 1, univariable; model 2 controls for baseline eGFR, urine albumin to creatinine ratio and serum creatinine at biopsy; model 3, additionally controls for glomerulosclerosis<sup>1</sup> and interstitial fibrosis<sup>2</sup>*



**Supplemental Table 8. Association of uromodulin with tubulointerstitial and glomerular fibrosis with multiple imputations to account for missing data**

| <b>Histological feature</b>                                    | <b>Difference in histological feature per 2-fold difference in uromodulin</b> |
|----------------------------------------------------------------|-------------------------------------------------------------------------------|
| <b>Interstitial fibrosis</b> (% of kidney tissue) <sup>1</sup> | <b>-3.4 (-6.3, -0.55)</b>                                                     |
| <b>Glomerulosclerosis</b> (% of glomeruli) <sup>2</sup>        | -2.2 (-5.8, 1.5)                                                              |

*Analysis: Linear regression analysis with outcome as histological feature (interstitial fibrosis or glomerulosclerosis) and exposure as uromodulin level (log<sub>2</sub> or tertile). Values represent unit differences in outcome (% of total biopsy tissue for IF/TA or % of glomeruli that have global sclerosis for glomerulosclerosis) for each unit (2-fold or tertile) difference of urine uromodulin level. Significant associations in bold.*

*Controls for baseline eGFR, urine albumin to creatinine ratio and serum creatinine at biopsy, and either glomerulosclerosis<sup>1</sup> or interstitial fibrosis<sup>2</sup>*

**Supplemental Table 9. Comparison of uromodulin staining on various mouse kidney biopsy models**

| <b>Comparison</b>     | <b>Mean Difference (95% CI)</b> | <b>P Value</b> |
|-----------------------|---------------------------------|----------------|
| Fibrotic vs. Repaired | -0.097 (-0.140, -0.053)         | <0.0001        |
| Fibrotic vs. Normal   | -0.048 (-0.003, -0.094)         | 0.04           |
| Normal vs. Repaired   | -0.048 (-0.094, -0.003)         | 0.04           |

*Difference noted in micrometer<sup>2</sup> of kidney tissue staining for uromodulin*

Supplemental Figure 1. STARD flow diagram

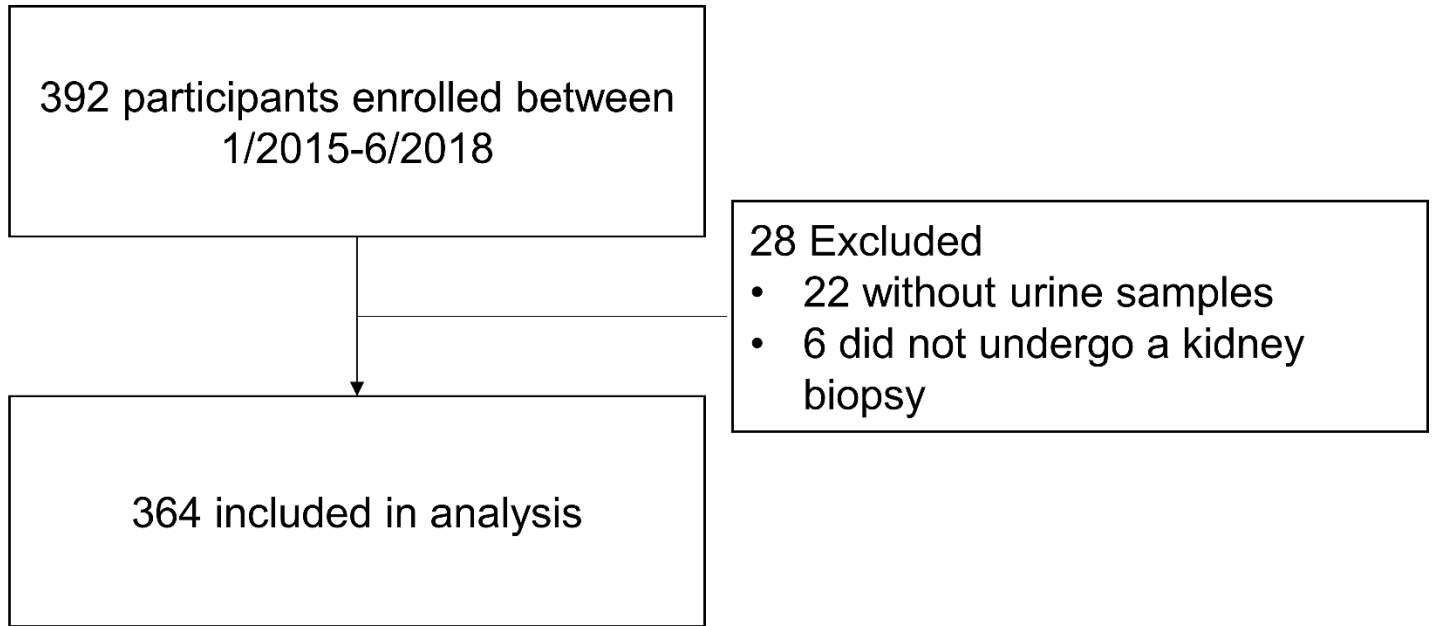

Supplement: CJN.04360422SupplementaryData.pdf [file CJN.04360422SupplementaryData.pdf]
